# Supplementary material
Source: Elsevier journal article supplement (https://www.sciencedirect.com/science/article/pii/S0211139X2100144X)
Supplement: mmc1 [file S0211139X2100144X:mmc1.doc]

**Respuesta a revisores al respecto del artículo Ref. REGG-D-21-00052:**

Respecto a los comentarios aportados por el **primer revisor**, estamos de acuerdo y lamentamos no haber documentado de forma pormenorizada cómo se llegó al diagnóstico de Enfermedad de Alzheimer en un varón de 87 años en una unidad de demencias, por lo que, a continuación, describimos en detalle el curso clínico (datos recopilados de la historia informatizada del paciente en los servicios de salud públicos):

- Cuadro de inicio insidioso de 4 años de evolución y curso progresivo, de alteración cognitiva de predominio amnésico (“no recordaba las noticias, podía ver un partido varias veces sin recordar que lo había visto antes”), con empeoramiento en contexto de cambios de rutina (mayor desorientación). No alteración predominante del lenguaje. Dicho deterioro tenía repercusión en la funcionalidad, de forma creciente, comenzando con alteración en funciones instrumentales, pero también en básicas (precisando supervisión en el aseo). La exploración neurológica era rigurosamente normal, sin signos de afectación extrapiramidal ni alteración de los reflejos de liberación frontal, ni alteración de la marcha.
- En las pruebas complementarias destaca analítica completa con perfil cognitivo, incluida serología luética, todo normal, salvo leve déficit de fólico. En el estudio neuropsicológico se aprecian déficits en el ámbito mnésico-disejecutivo con una puntuación MEC: 21/35. La RMN cerebral muestra una retracción cortical difusa con atrofia con predominio frontal y temporal y signos de leucoaraiosis supratentorial. En estudio con SPECT: hipoperfusión parieto-temporal bilateral con leve hipoperfusión frontal izquierda.
- No se dispone de estudio de biomarcadores en LCR y/o PET amiloide cuando se valoró a este paciente, ya que hace varios años (aproximadamente 6 años) no eran considerados como práctica clínica habitual, sobre todo teniendo en cuenta su edad y la falta de colaboración por su conducta.

Por todo ello, se consideró como primera posibilidad una demencia por E. Alzheimer ya que cumplía citerios NIA-AA.

Aunque se planteó entre las posibilidades etiológicas una demencia frontotemporal, la edad de inicio del paciente, la ausencia de antecedentes familiares y que no cumplía los criterios de demencia frontotemporal variante conductual de Raskovsky et al (2011): solo cumplía desinhibición conductual (no claramente precoz) y perseverancia pero no tenía perdida de apatía, ni perdida de empatía, ni hiperoralidad ni esteriotipias y el resultado de las pruebas complementarias descritas arriba, se consideró el diagnóstico de demencia tipo Alzheimer. Adicionalmente, la mala respuesta a ISRS y trazodona a un aparente síndrome de desinhibición frontal hizo descartar la demencia frontotemporal como primera opción diagnóstica más plausible.

Al cumplir criterios de E. Alzheimer y no tener contraindicación se inició, según guías clínicas, tratamiento con anticolinesterásicos. Es de destacar, que la alteración conductual descrita no coincide temporalmente con el inicio del donepezilo. Y, de hecho, cuando se consigue la remisión sintomática el paciente sigue tomando donepezilo. Los síntomas neuropsiquiátricos fueron valorados precozmente por Psiquiatría, dada la mala tolerancia familiar y el fácil acceso a dicha consulta, no obstante, siempre hubo un contacto y seguimiento por ambas especialidades.

Tras lo explicado, no consideramos que haya habido una mala praxis, pero entendemos que no quedó reflejado en el texto como se llegó al diagnóstico de demencia por enfermedad de Alzheimer en este paciente de 87 años, ya que el objetivo del caso era exponer su abordaje conductual. No obstante, ampliamos la información a este respecto en el texto y con lo descrito anteriormente, creemos explicado correctamente cómo se llegó a este diagnóstico.

Agradecemos al primer revisor las referencias de Méndez y de Noufi et al, pero creemos que con la nueva redacción del caso haciendo un mayor hincapié en el proceso diagnóstico inicial previo a la valoración psiquiátrica queda más patente la existencia de un trastorno psiquiátrico emergente sobre una enfermedad neurodegenerativa de larga data y bien establecida, así como la ausencia de una relación temporal entre el inicio de la clínica maniforme y el empleo de donepezilo.

Con respecto al manejo farmacológico de un cuadro de consistencia maniaca, el tratamiento se adapta a los estándares que recomienda por ejemplo el posicionamiento de la Sociedad Española de Psicogeriatría acerca del uso de antipsicóticos en la edad avanzada, documento que ha sido añadido a la bibliografía. De hecho, el empeoramiento coincidente en el tiempo con el empleo de fármacos antidepresivos (ISRS y trazodona), el empleo de dosis moderadas de terapia en combinación de ácido valproico y quetiapina, su buena tolerancia y efectividad, así como un empeoramiento al reducir dosis con mejora al titular de nuevo la dosis de los fármacos entra dentro de lo esperable en un paciente de cualquier edad que presente un trastorno psiquiátrico primario. Que un paciente con un síndrome maniaco empeore con antidepresivos y mejore con tratamiento combinado con un eutimizante y un antipsicótico es habitual, pero lo interesante del caso, a nuestro entender, son tres aspectos:

1. El debut de la sintomatología maniaca años después del desarrollo de un trastorno neurocognitivo mayor.
2. El error inicial diagnóstico inicial ante las alteraciones de conducta, considerando un diagnóstico, sobre el papel mucho más probable, de síndrome de desinhibición frontal.
3. La buena respuesta y buena tolerancia a un tratamiento en combinación estándar para un caso de trastorno bipolar en la edad geriátrica.

Con respecto a los comentarios aportador por el **segundo revisor**, hemos procedido a modificar la redacción del texto de cara a incluir el resumen y las palabras clave, a diferenciar en apartados (introducción, método, discusión y conclusiones) el texto y a corregir los errores en las referencias y en la bibliografía.
